# Supplementary material for: A thrombolytic therapy using diagnostic ultrasound combined with RGDS-targeted microbubbles and urokinase in a rabbit model
Source: PubMed Central journal article supplement (PMC7385658; doi:10.1038/s41598-020-69202-9), 2020-07-27
Supplement: 41598_2020_69202_MOESM1_ESM.pdf [file 41598_2020_69202_MOESM1_ESM.pdf]

**A thrombolytic therapy using diagnostic ultrasound combined with  
RGDS-targeted microbubbles and urokinase in a rabbit model**

**Running title:** A new thrombolytic therapy in a rabbit model

Lina Guan, MD, Chunmei Wang, MS, Xue Yan, MS, Liyun Liu, MD, Yanhong Li,  
MS, Yuming Mu, MD\*

Department of Echocardiography, First Affiliated Hospital of Xinjiang Medical  
University, Urumqi, Xinjiang, P.R. China

**\*Corresponding Author:**

Yuming Mu, MD

Department of Echocardiography, First Affiliated Hospital of Xinjiang Medical  
University, Urumqi, Xinjiang, P.R. China

Tel: +86-13009639971

Fax: +86-21-57643271

E-mail: yumingmu@yeah.net

**Supplementary Figure S1.**

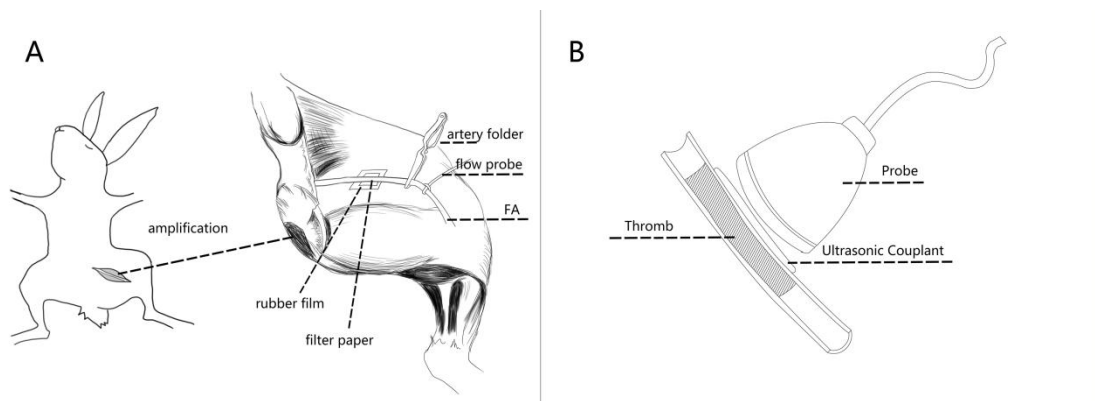

Schematic image of rat model for acute femoral artery embolism.
